# Supplementary material
Source: publisher figshare collection journal article supplement (https://sage.figshare.com/ndownloader/files/15342320)

*Appendix A*

Figure 1. Caregiver Identified Activities of Infants/Toddlers and Frequency of Response

Sixty-one activities were identified from in-person interviews, written diaries and online surveys with caregivers of children under 36 months of age. Ongoing analysis to code for themes determined when saturation was reached. This list reflects any activity reported by >20% of respondents.


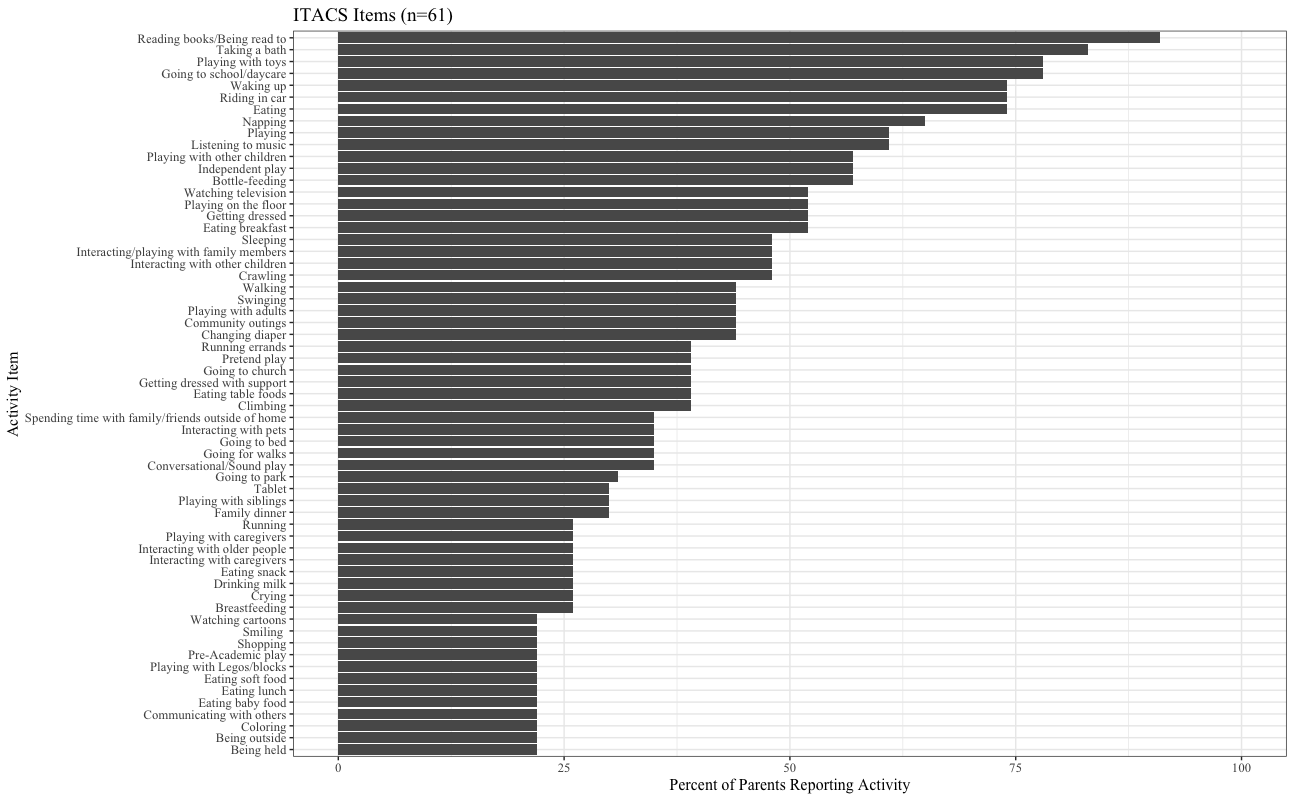

Supplement: Supplementary file 1 [file 15342320]
